# Supplementary material for: High-Resolution Mass Spectrometry-Based Metabolomics for Increased Grape Juice Metabolite Coverage
Source: MDPI journal article supplement (doi:10.3390/foods13010054), 2023-12-22
Supplement: s1 [file s1]

**Table S1.** Summary of the harvest date ranges for the different vintages, varieties and hemispheres.

| Vintage | Hemisphere | Variety    | Harvest dates range (min ; max) |
|---------|------------|------------|---------------------------------|
| 2019    | North      | Aligoté    | 2019-08-27 ; 2019-09-18         |
|         |            | Chardonnay | 2019-08-22 ; 2019-09-24         |
|         |            | Meunier    | 2019-08-27 ; 2019-09-16         |
|         |            | Pinot noir | 2019-08-27 ; 2019-10-01         |
|         | South      | Chardonnay | 2019-03-06 ; 2019-03-20         |
|         |            | Pinot noir | 2019-02-28 ; 2019-03-20         |
| 2020    | North      | Aligoté    | 2020-08-14 ; 2020-09-10         |
|         |            | Chardonnay | 2020-08-14 ; 2020-09-11         |
|         |            | Meunier    | 2020-08-14 ; 2020-08-20         |
|         |            | Pinot noir | 2020-08-14 ; 2020-09-11         |
|         | South      | Chardonnay | 2020-02-20 ; 2020-03-09         |
|         |            | Pinot noir | 2020-02-21 ; 2020-03-06         |
| 2021    | North      | Aligoté    | 2021-08-31 ; 2021-09-27         |
|         |            | Chardonnay | 2021-08-31 ; 2021-10-14         |
|         |            | Meunier    | 2021-08-31 ; 2021-10-14         |
|         |            | Pinot noir | 2020-08-25 ; 2021-10-14         |

**Table S2.** Summary of all **DI**-FT-ICR-MS and **RP**-UHPLC-Q-ToF-MS mass peaks alignments broken down by common elemental compositions. The color code for common elemental compositions is the same as in Figure 3, “n” corresponds to the number of common elemental compositions between the two analytical methods within a 2 ppm mass peaks alignment error, “mean” is the average number of retention times associated with a given elemental composition (LC-MS analyses), and “range” indicates the range of retention times associated with a given elemental composition (LC-MS analyses). The column ID refer to the column number in Figure 3.

| ID | DI-FT-ICR-MS   |     |         | RP-UHPLC-Q-ToF-MS |         | DI-FT-ICR-MS                                |                | RP-UHPLC-Q-ToF-MS SPE |                |            |       | RP-UHPLC-Q-ToF-MS non SPE |                |            |       |
|----|----------------|-----|---------|-------------------|---------|---------------------------------------------|----------------|-----------------------|----------------|------------|-------|---------------------------|----------------|------------|-------|
|    | Chemical Class | SPE | non SPE | SPE               | non SPE | n<br>Total                                  | Chemical Class | n<br>Total            | Chemical Class | n isobares |       | n<br>Total                | Chemical Class | n isobares |       |
|    |                |     |         |                   |         |                                             |                |                       |                | mean       | range |                           |                | mean       | range |
| 1  | CHO            | ✓   |         |                   |         | 4 629                                       | 1 700 (36.7%)  |                       |                |            |       |                           |                |            |       |
|    | CHNO           |     |         |                   |         |                                             | 931 (20.1%)    |                       |                |            |       |                           |                |            |       |
|    | CHNOS          |     |         |                   |         |                                             | 1 141 (24.6%)  |                       |                |            |       |                           |                |            |       |
|    | CHOS           |     |         |                   |         |                                             | 857 (18.5%)    |                       |                |            |       |                           |                |            |       |
| 2  | CHO            |     | ✓       |                   |         | 2 400                                       | 855 (35.6%)    |                       |                |            |       |                           |                |            |       |
|    | CHNO           |     |         |                   |         |                                             | 470 (19.6%)    |                       |                |            |       |                           |                |            |       |
|    | CHNOS          |     |         |                   |         |                                             | 637 (26.5%)    |                       |                |            |       |                           |                |            |       |
|    | CHOS           |     |         |                   |         |                                             | 438 (18.2%)    |                       |                |            |       |                           |                |            |       |
| 3  |                |     |         | ✓                 |         |                                             |                | 1,648                 |                |            |       |                           |                |            |       |
| 4  |                |     |         |                   | ✓       |                                             |                |                       |                |            |       | 1,599                     |                |            |       |
| 5  | CHO            | ✓   | ✓       |                   |         | 1 159<br>(SPE : 21.1%)<br>(non SPE : 38.6%) | 636 (54.9%)    |                       |                |            |       |                           |                |            |       |
|    | CHNO           |     |         |                   |         |                                             | 226 (19.5%)    |                       |                |            |       |                           |                |            |       |
|    | CHNOS          |     |         |                   |         |                                             | 127 (11%)      |                       |                |            |       |                           |                |            |       |
|    | CHOS           |     |         |                   |         |                                             | 170 (14.7%)    |                       |                |            |       |                           |                |            |       |
| 6  | CHO            | ✓   |         | ✓                 |         | 623 (11.4%)                                 | 430 (69%)      | 1035 (62.8%)          | 794 (76.7%)    | 1.8        | 1--8  |                           |                |            |       |
|    | CHNO           |     |         |                   |         |                                             | 58 (9.3%)      |                       | 71 (6.9%)      | 1.2        | 1--5  |                           |                |            |       |
|    | CHNOS          |     |         |                   |         |                                             | 58 (9.3%)      |                       | 77 (6.9%)      | 1.3        | 1--6  |                           |                |            |       |
|    | CHOS           |     |         |                   |         |                                             | 77 (12.4%)     |                       | 93 (9%)        | 1.2        | 1--4  |                           |                |            |       |
| 7  |                |     |         | ✓                 | ✓       |                                             |                | 573 (34.8%)           |                |            |       | 573 (35.8%)               |                |            |       |
| 8  | CHO            |     | ✓       |                   | ✓       | 368 (12.2%)                                 | 246 (66.8%)    |                       |                |            |       | 825 (51.6%)               | 623 (75.5%)    | 2.5        | 1--13 |
|    | CHNO           |     |         |                   |         |                                             | 55 (14.9%)     |                       |                |            |       |                           | 99 (12%)       | 1.8        | 1--5  |
|    | CHNOS          |     |         |                   |         |                                             | 28 (7.6%)      |                       |                |            |       |                           | 47 (5.7%)      | 1.7        | 1--6  |
|    | CHOS           |     |         |                   |         |                                             | 39 (10.6%)     |                       |                |            |       |                           | 56 (6.8%)      | 1.4        | 1--4  |

| ID | DI-FT-ICR-MS   |     |         | RP-UHPLC-Q-ToF-MS |         | DI-FT-ICR-MS                          |                     | RP-UHPLC-Q-ToF-MS SPE |                     |            |       | RP-UHPLC-Q-ToF-MS non SPE |                     |            |       |
|----|----------------|-----|---------|-------------------|---------|---------------------------------------|---------------------|-----------------------|---------------------|------------|-------|---------------------------|---------------------|------------|-------|
|    | Chemical Class | SPE | non SPE | SPE               | non SPE | n<br>Total                            | n<br>Chemical Class | n<br>Total            | n<br>Chemical Class | n isobares |       | n<br>Total                | n<br>Chemical Class | n isobares |       |
|    |                |     |         |                   |         |                                       |                     |                       |                     | mean       | range |                           |                     | mean       | range |
| 9  | CHO            | ✓   | ✓       | ✓                 | ✓       | 210<br>(SPE : 3.8%)<br>(non SPE : 7%) | 154 (73.3%)         | 294 (28.3.4%)         | 234 (79.6%)         | 1.5        | 1--6  | 294 (37.5%)               | 234 (79.6%)         | 1.5        | 1--6  |
|    | CHNO           |     |         |                   |         |                                       | 26 (12.4%)          |                       | 29 (9.9%)           | 1.1        | 1--2  |                           | 29 (9.9%)           | 1.1        | 1--2  |
|    | CHNOS          |     |         |                   |         |                                       | 9 (4.3%)            |                       | 10 (3.4%)           | 1.1        | 1--2  |                           | 10 (3.4%)           | 1.1        | 1--2  |
|    | CHOS           |     |         |                   |         |                                       | 21 (10%)            |                       | 21 (7.1%)           | 1.0        | 1--1  |                           | 21 (7.1%)           | 1.0        | 1--1  |

**Table S3.** Statistical analyses parameters for the different grape variety discriminations shown in Figure 4; CH : Chardonnay, PN : Pinot noir , Al : Aligoté, Me : Meunier. Subset<sup>1</sup> : subset of samples from similar vineyards as in CH~Al subset; Subset<sup>2</sup> : subset of samples from similar vineyards as in PN~Me subset.

| Measure Method    | Samples preparation | Comparaison               | n samples | n features | R2X(cum) | R2Y(cum) | Q2(cum) | RMSEE  | n orthogonal | p-value R2Y | p-value Q2 |
|-------------------|---------------------|---------------------------|-----------|------------|----------|----------|---------|--------|--------------|-------------|------------|
| DI-FT-ICR-MS      | SPE                 | CH~PN                     | 252       | 1677       | 0.533    | 0.97     | 0.953   | 0.0863 | 4            | 0.002       | 0.002      |
|                   | non SPE             |                           |           | 599        | 0.535    | 0.975    | 0.944   | 0.0793 | 5            | 0.002       | 0.002      |
| RP-UHPLC-Q-ToF-MS | SPE                 |                           |           | 1449       | 0.369    | 0.984    | 0.977   | 0.064  | 2            | 0.002       | 0.002      |
|                   | non SPE             |                           |           | 1283       | 0.278    | 0.979    | 0.958   | 0.0733 | 3            | 0.002       | 0.002      |
| DI-FT-ICR-MS      | SPE                 | CH~Al                     | 44        | 1379       | 0.337    | 0.972    | 0.908   | 0.0873 | 2            | 0.002       | 0.002      |
|                   | non SPE             |                           |           | 702        | 0.5      | 0.986    | 0.837   | 0.0641 | 4            | 0.002       | 0.002      |
| RP-UHPLC-Q-ToF-MS | SPE                 |                           |           | 1412       | 0.321    | 0.993    | 0.949   | 0.0437 | 2            | 0.002       | 0.002      |
|                   | non SPE             |                           |           | 1240       | 0.204    | 0.989    | 0.673   | 0.0552 | 2            | 0.002       | 0.002      |
| DI-FT-ICR-MS      | SPE                 | CH~PN Subset <sup>1</sup> | 44        | 1551       | 0.48     | 0.982    | 0.839   | 0.0718 | 3            | 0.002       | 0.002      |
|                   | non SPE             |                           |           | 706        | 0.532    | 0.988    | 0.851   | 0.0596 | 4            | 0.002       | 0.002      |
| RP-UHPLC-Q-ToF-MS | SPE                 |                           |           | 1476       | 0.415    | 0.988    | 0.941   | 0.0576 | 2            | 0.002       | 0.002      |
|                   | non SPE             |                           |           | 1282       | 0.265    | 0.989    | 0.824   | 0.0555 | 2            | 0.002       | 0.002      |
| DI-FT-ICR-MS      | SPE                 | CH~PN Subset <sup>2</sup> | 28        | 1622       | 0.509    | 0.983    | 0.779   | 0.072  | 3            | 0.002       | 0.002      |
|                   | non SPE             |                           |           | 786        | 0.573    | 0.994    | 0.76    | 0.0424 | 4            | 0.002       | 0.002      |
| RP-UHPLC-Q-ToF-MS | SPE                 |                           |           | 1482       | 0.441    | 0.992    | 0.925   | 0.0475 | 2            | 0.002       | 0.002      |
|                   | non SPE             |                           |           | 1289       | 0.297    | 0.996    | 0.798   | 0.0331 | 2            | 0.002       | 0.002      |
| DI-FT-ICR-MS      | SPE                 | PN~Me                     | 28        | 1693       |          |          |         |        |              |             |            |
|                   | non SPE             |                           |           | 707        |          |          |         |        |              |             |            |
| RP-UHPLC-Q-ToF-MS | SPE                 |                           |           | 1467       |          |          |         |        |              |             |            |
|                   | non SPE             |                           |           | 1467       |          |          |         |        |              |             |            |

**Table S4.** Summary of all DI-FT-ICR-MS and RP-UHPLC-Q-ToF-MS mass peaks alignments that significantly discriminate Chardonnay and Pinot noir. All the masses have a VIP value >1.3 and an adjusted p.vale (FDR) <0.05 for the test of comparaisn of intensity means test comparaisn. m/z values refer to the negative ion mass; rt: retention time; n : number of retention times for a given mass.

| Method | DI-FT-ICR-MS |                                                 |        |       |       |       | RP-UHPLC-Q-ToF-MS |      |        |   | Data base Annotation                        |                                    |                           |
|--------|--------------|-------------------------------------------------|--------|-------|-------|-------|-------------------|------|--------|---|---------------------------------------------|------------------------------------|---------------------------|
|        | m/z          | Formula                                         | Adduct | Class | H/C   | O/C   | m/z               | rt   | Ions   | n | Name                                        | Data base ID                       | Data base                 |
| SPE    | 293.1241615  | C <sub>12</sub> H <sub>22</sub> O <sub>8</sub>  | [M-H]- | CHO   | 1.833 | 0.667 | 293.12377         | 2.41 | [M-H]- | 2 |                                             |                                    |                           |
|        |              |                                                 |        |       |       |       | 293.12390         | 2.52 | [M-H]- | 2 |                                             |                                    |                           |
|        | 307.1762035  | C <sub>14</sub> H <sub>28</sub> O <sub>7</sub>  | [M-H]- | CHO   | 2.000 | 0.500 | 307.17570         | 1.15 | [M-H]- | 2 |                                             |                                    |                           |
|        |              |                                                 |        |       |       |       | 307.17566         | 1.33 | [M-H]- | 2 |                                             |                                    |                           |
|        | 315.0510072  | C <sub>16</sub> H <sub>12</sub> O <sub>7</sub>  | [M-H]- | CHO   | 0.750 | 0.438 | 315.05062         | 2.95 | [M-H]- | 2 | 1,5,7-trihydroxy-6,8-dimethoxyanthraquinone | CPD-9630                           | PlantCyclMetaCyc          |
|        |              |                                                 |        |       |       |       |                   |      |        |   | 3-O-methylquercetin                         | 3457-TETRAHYDROXY-3-METHOXYFLAVONE | PlantCyclMetaCyc          |
|        |              |                                                 |        |       |       |       |                   |      |        |   | 8-methoxykaempferol                         | CPD-16764                          | PlantCyclMetaCyc          |
|        |              |                                                 |        |       |       |       |                   |      |        |   | demethylsulochrin                           | DESMETHYLSULOCHRI N                | MetaCyc                   |
|        |              |                                                 |        |       |       |       |                   |      |        |   | isorhamnetin                                | CPD-8004                           | GrapeCyclPlantCyclMetaCyc |
|        |              |                                                 |        |       |       |       |                   |      |        |   | petunidin                                   | CPD-15003                          | MetaCyc                   |
|        |              |                                                 |        |       |       |       |                   |      |        |   | rhamnetin                                   | CPD-13511                          | PlantCyclMetaCyc          |
|        |              |                                                 |        |       |       |       |                   |      |        |   | robustaquinone E                            | CPD-9619                           | PlantCyclMetaCyc          |
|        |              |                                                 |        |       |       |       |                   |      |        |   | selgin                                      | CPD-12571                          | PlantCyclMetaCyc          |
|        |              |                                                 |        |       |       |       |                   |      |        |   | tamarixetin                                 | CPD-20494                          | MetaCyc                   |
|        |              |                                                 |        |       |       |       | 315.05043         | 4.12 | [M-H]- | 2 | 1,5,7-trihydroxy-6,8-dimethoxyanthraquinone | CPD-9630                           | PlantCyclMetaCyc          |
|        |              |                                                 |        |       |       |       |                   |      |        |   | 3-O-methylquercetin                         | 3457-TETRAHYDROXY-3-METHOXYFLAVONE | PlantCyclMetaCyc          |
|        |              |                                                 |        |       |       |       |                   |      |        |   | 8-methoxykaempferol                         | CPD-16764                          | PlantCyclMetaCyc          |
|        |              |                                                 |        |       |       |       |                   |      |        |   | demethylsulochrin                           | DESMETHYLSULOCHRI N                | MetaCyc                   |
|        |              |                                                 |        |       |       |       |                   |      |        |   | isorhamnetin                                | CPD-8004                           | GrapeCyclPlantCyclMetaCyc |
|        |              |                                                 |        |       |       |       |                   |      |        |   | petunidin                                   | CPD-15003                          | MetaCyc                   |
|        |              |                                                 |        |       |       |       |                   |      |        |   | rhamnetin                                   | CPD-13511                          | PlantCyclMetaCyc          |
|        |              |                                                 |        |       |       |       |                   |      |        |   | robustaquinone E                            | CPD-9619                           | PlantCyclMetaCyc          |
|        |              |                                                 |        |       |       |       |                   |      |        |   | selgin                                      | CPD-12571                          | PlantCyclMetaCyc          |
|        |              |                                                 |        |       |       |       |                   |      |        |   | tamarixetin                                 | CPD-20494                          | MetaCyc                   |
|        | 333.0615928  | C <sub>16</sub> H <sub>14</sub> O <sub>8</sub>  | [M-H]- | CHO   | 0.875 | 0.500 | 333.06094         | 3.07 | [M-H]- | 2 | 8-O-methyl-13-carboxynorjavanicin           | CPD-18190                          | MetaCyc                   |
|        |              |                                                 |        |       |       |       | 333.06067         | 3.22 | [M-H]- | 2 | 8-O-methyl-fusarubinlactone                 | CPD-18197                          | MetaCyc                   |
|        | 355.0670738  | C <sub>15</sub> H <sub>16</sub> O <sub>10</sub> | [M-H]- | CHO   | 1.067 | 0.667 | 355.06676         | 1.17 | [M-H]- | 3 | 8-O-methyl-13-carboxynorjavanicin           | CPD-18190                          | MetaCyc                   |
|        |              |                                                 |        |       |       |       | 355.06674         | 2.56 | [M-H]- | 3 | 8-O-methyl-fusarubinlactone                 | CPD-18197                          | MetaCyc                   |
|        | 359.0983807  | C <sub>15</sub> H <sub>20</sub> O <sub>10</sub> | [M-H]- | CHO   | 1.333 | 0.667 | 359.09796         | 1.11 | [M-H]- | 4 |                                             |                                    |                           |
|        |              |                                                 |        |       |       |       | 359.09797         | 1.31 | [M-H]- | 4 |                                             |                                    |                           |
|        |              |                                                 |        |       |       |       | 359.09789         | 1.51 | [M-H]- | 4 |                                             |                                    |                           |

| Method      | DI-FT-ICR-MS                                    |                                                  |        |       |       |           | RP-UHPLC-Q-ToF-MS |        |                                 |                                                  | Data base Annotation                                        |                  |                  |
|-------------|-------------------------------------------------|--------------------------------------------------|--------|-------|-------|-----------|-------------------|--------|---------------------------------|--------------------------------------------------|-------------------------------------------------------------|------------------|------------------|
|             | m/z                                             | Formula                                          | Adduct | Class | H/C   | O/C       | m/z               | rt     | Ions                            | n                                                | Name                                                        | Data base ID     | Data base        |
|             |                                                 |                                                  |        |       |       |           | 359.09804         | 1.83   | [M-H]-                          | 4                                                |                                                             |                  |                  |
|             | 367.1610000                                     | C <sub>15</sub> H <sub>28</sub> O <sub>10</sub>  | [M-H]- | CHO   | 1.867 | 0.667     | 367.16046         | 1.73   | [M-H]-                          | 2                                                | (2S)-((6-O-(β-D-apiofuranosyl)β-D-glucopyranosyl)oxy)butane | CPD-15071        | MetaCyc          |
|             |                                                 |                                                  |        |       |       |           | 367.16037         | 2.15   | [M-H]-, [M+Cl]-                 | 2                                                | (2S)-((6-O-(β-D-apiofuranosyl)β-D-glucopyranosyl)oxy)butane | CPD-15071        | MetaCyc          |
|             | 393.1766500                                     | C <sub>17</sub> H <sub>30</sub> O <sub>10</sub>  | [M-H]- | CHO   | 1.765 | 0.588     | 393.17581         | 2.50   | [M-H]-                          | 2                                                |                                                             |                  |                  |
|             |                                                 |                                                  |        |       |       |           | 393.17543         | 2.99   | [M-H]-                          | 2                                                |                                                             |                  |                  |
|             | 403.1610097                                     | C <sub>18</sub> H <sub>28</sub> O <sub>10</sub>  | [M-H]- | CHO   | 1.556 | 0.556     | 403.16042         | 2.86   | [M-H]-                          | 2                                                |                                                             |                  |                  |
|             |                                                 |                                                  |        |       |       |           | 403.16017         | 3.02   | [M-H]-                          | 2                                                |                                                             |                  |                  |
|             | 413.1664951                                     | C <sub>16</sub> H <sub>30</sub> O <sub>12</sub>  | [M-H]- | CHO   | 1.875 | 0.750     | 413.16613         | 1.74   | [M-H]-                          | 2                                                |                                                             |                  |                  |
|             |                                                 |                                                  |        |       |       |           | 413.16592         | 2.16   | [M-H]-                          | 2                                                |                                                             |                  |                  |
|             | 427.0858000                                     | C <sub>22</sub> H <sub>20</sub> O <sub>7</sub> S | [M-H]- | CHOS  | 0.909 | 0.318     | 427.08511         | 1.11   | [M-H]-                          | 2                                                |                                                             |                  |                  |
|             |                                                 |                                                  |        |       |       |           | 427.08498         | 1.50   | [M-H]-                          | 2                                                |                                                             |                  |                  |
|             | 435.2236000                                     | C <sub>20</sub> H <sub>36</sub> O <sub>10</sub>  | [M-H]- | CHO   | 1.800 | 0.500     | 435.22286         | 2.67   | [M-H]-                          | 2                                                |                                                             |                  |                  |
|             |                                                 |                                                  |        |       |       |           | 435.22254         | 3.05   | [M-H]-                          | 2                                                |                                                             |                  |                  |
|             | 477.1039597                                     | C <sub>22</sub> H <sub>22</sub> O <sub>12</sub>  | [M-H]- | CHO   | 1.000 | 0.545     | 477.10288         | 2.60   | [M-H]-                          | 2                                                | isorhamnetin 3-O-glucoside                                  | CPD-14969        | PlantCyclMetaCyc |
|             |                                                 |                                                  |        |       |       |           |                   |        |                                 |                                                  | isorhamnetin 7-O-glucoside                                  | CPD-14972        | MetaCyc          |
|             |                                                 |                                                  |        |       |       |           |                   |        |                                 |                                                  | rhamnetin 3-O-glucoside                                     | CPD-14970        | MetaCyc          |
|             |                                                 |                                                  |        |       |       |           | 477.10287         | 3.04   | [M-H]-                          | 2                                                | isorhamnetin 3-O-glucoside                                  | CPD-14969        | PlantCyclMetaCyc |
|             |                                                 |                                                  |        |       |       |           |                   |        |                                 |                                                  | isorhamnetin 7-O-glucoside                                  | CPD-14972        | MetaCyc          |
|             |                                                 |                                                  |        |       |       |           |                   |        |                                 |                                                  | rhamnetin 3-O-glucoside                                     | CPD-14970        | MetaCyc          |
|             | 495.1145000                                     | C <sub>22</sub> H <sub>24</sub> O <sub>13</sub>  | [M-H]- | CHO   | 1.091 | 0.591     | 495.11381         | 2.79   | [M-H]-                          | 2                                                |                                                             |                  |                  |
|             |                                                 |                                                  |        |       |       |           | 495.11360         | 2.90   | [M-H]-                          | 2                                                |                                                             |                  |                  |
|             | 507.1146000                                     | C <sub>23</sub> H <sub>24</sub> O <sub>13</sub>  | [M-H]- | CHO   | 1.043 | 0.565     | 507.11419         | 2.53   | [M-H]-                          | 4                                                | eupatolitin 3-glucoside                                     | CPD-14911        | PlantCyclMetaCyc |
|             |                                                 |                                                  |        |       |       |           | 507.11386         | 2.86   | [M-H]-                          | 4                                                | eupatolitin 3-glucoside                                     | CPD-14911        | PlantCyclMetaCyc |
|             |                                                 |                                                  |        |       |       |           | 507.11367         | 3.04   | [M-H]-                          | 4                                                | eupatolitin 3-glucoside                                     | CPD-14911        | PlantCyclMetaCyc |
|             |                                                 |                                                  |        |       |       |           | 507.11404         | 3.20   | [M-H]-                          | 4                                                | eupatolitin 3-glucoside                                     | CPD-14911        | PlantCyclMetaCyc |
|             | 509.1302000                                     | C <sub>23</sub> H <sub>26</sub> O <sub>13</sub>  | [M-H]- | CHO   | 1.130 | 0.565     | 509.12926         | 1.81   | [M-H]-                          | 3                                                |                                                             |                  |                  |
|             |                                                 |                                                  |        |       |       |           | 509.12967         | 2.58   | [M-H]-, [M-H-H <sub>2</sub> O]- | 3                                                |                                                             |                  |                  |
|             |                                                 |                                                  |        |       |       |           | 509.12934         | 2.82   | [M-H]-                          | 3                                                |                                                             |                  |                  |
| 509.2241000 | C <sub>22</sub> H <sub>38</sub> O <sub>13</sub> | [M-H]-                                           | CHO    | 1.727 | 0.591 | 509.22330 | 2.74              | [M-H]- | 3                               | 2,4-di(3-methylbutanoyl)sucrose                  | CPD-19120                                                   | PlantCyclMetaCyc |                  |
|             |                                                 |                                                  |        |       |       |           |                   |        |                                 | 2,4-di-(2-methyl)butanoyl-sucrose                | CPD-20291                                                   | MetaCyc          |                  |
|             |                                                 |                                                  |        |       |       |           |                   |        |                                 | 2-(2-methyl)butanoyl-4-isovaleroyl-sucrose       | CPD-20292                                                   | MetaCyc          |                  |
|             |                                                 |                                                  |        |       |       |           |                   |        |                                 | 3',4-di-(3-methyl)butanoyl-sucrose               | CPD-19613                                                   | MetaCyc          |                  |
|             |                                                 |                                                  |        |       |       |           |                   |        |                                 | 3,4-di(3-methylbutanoyl)sucrose                  | CPD-21955                                                   | PlantCyclMetaCyc |                  |
|             |                                                 |                                                  |        |       |       |           |                   |        |                                 | 3-(2-methylbutanoyl)-4-(3-methylbutanoyl)sucrose | CPD-19025                                                   | PlantCyclMetaCyc |                  |
|             |                                                 |                                                  |        |       |       | 509.22347 | 3.05              | [M-H]- | 3                               | 2,4-di(3-methylbutanoyl)sucrose                  | CPD-19120                                                   | PlantCyclMetaCyc |                  |
|             |                                                 |                                                  |        |       |       |           |                   |        |                                 | 2,4-di-(2-methyl)butanoyl-sucrose                | CPD-20291                                                   | MetaCyc          |                  |
|             |                                                 |                                                  |        |       |       |           |                   |        |                                 | 2-(2-methyl)butanoyl-4-isovaleroyl-sucrose       | CPD-20292                                                   | MetaCyc          |                  |
|             |                                                 |                                                  |        |       |       |           |                   |        |                                 | 3',4-di-(3-methyl)butanoyl-sucrose               | CPD-19613                                                   | MetaCyc          |                  |
|             |                                                 |                                                  |        |       |       |           |                   |        |                                 | 3,4-di(3-methylbutanoyl)sucrose                  | CPD-21955                                                   | PlantCyclMetaCyc |                  |
|             |                                                 |                                                  |        |       |       |           |                   |        |                                 | 3-(2-methylbutanoyl)-4-(3-methylbutanoyl)sucrose | CPD-19025                                                   | PlantCyclMetaCyc |                  |

| Method  | DI-FT-ICR-MS |                                                                 |        |       |       |       | RP-UHPLC-Q-ToF-MS |      |        |   | Data base Annotation                             |                               |                           |
|---------|--------------|-----------------------------------------------------------------|--------|-------|-------|-------|-------------------|------|--------|---|--------------------------------------------------|-------------------------------|---------------------------|
|         | m/z          | Formula                                                         | Adduct | Class | H/C   | O/C   | m/z               | rt   | Ions   | n | Name                                             | Data base ID                  | Data base                 |
|         | 509.22352    |                                                                 |        |       |       |       | 509.22352         | 3.21 | [M-H]- | 3 | 2,4-di-(3-methylbutanoyl)sucrose                 | CPD-19120                     | PlantCyclMetaCyc          |
|         |              |                                                                 |        |       |       |       |                   |      |        |   | 2,4-di-(2-methyl)butanoyl-sucrose                | CPD-20291                     | MetaCyc                   |
|         |              |                                                                 |        |       |       |       |                   |      |        |   | 2-(2-methyl)butanoyl-4-isovaleroyl-sucrose       | CPD-20292                     | MetaCyc                   |
|         |              |                                                                 |        |       |       |       |                   |      |        |   | 3',4-di-(3-methyl)butanoyl-sucrose               | CPD-19613                     | MetaCyc                   |
|         |              |                                                                 |        |       |       |       |                   |      |        |   | 3,4-di(3-methylbutanoyl)sucrose                  | CPD-21955                     | PlantCyclMetaCyc          |
|         |              |                                                                 |        |       |       |       |                   |      |        |   | 3-(2-methylbutanoyl)-4-(3-methylbutanoyl)sucrose | CPD-19025                     | PlantCyclMetaCyc          |
|         | 517.1505000  | C <sub>14</sub> H <sub>30</sub> NaO <sub>9</sub> S <sub>2</sub> | [M-H]- | CHNOS | 2.143 | 0.643 | 517.15063         | 2.86 | [M-H]- | 3 |                                                  |                               |                           |
|         |              |                                                                 |        |       |       |       | 517.14982         | 3.08 | [M-H]- | 3 |                                                  |                               |                           |
|         |              |                                                                 |        |       |       |       | 517.14981         | 3.30 | [M-H]- | 3 |                                                  |                               |                           |
|         | 567.2297000  | C <sub>24</sub> H <sub>40</sub> O <sub>15</sub>                 | [M-H]- | CHO   | 1.667 | 0.625 | 567.22722         | 2.86 | [M-H]- | 2 |                                                  |                               |                           |
|         |              |                                                                 |        |       |       |       | 567.22653         | 3.03 | [M-H]- | 2 |                                                  |                               |                           |
|         | 641.1364000  | C <sub>27</sub> H <sub>30</sub> O <sub>18</sub>                 | [M-H]- | CHO   | 1.111 | 0.667 | 641.13464         | 2.27 | [M-H]- | 2 | myricetin 3-O-gentiobioside                      | CPD-14844                     | PlantCyclMetaCyc          |
|         |              |                                                                 |        |       |       |       | 641.13494         | 2.82 | [M-H]- | 2 | myricetin 3-O-gentiobioside                      | CPD-14844                     | PlantCyclMetaCyc          |
| non SPE | 315.1085297  | C <sub>14</sub> H <sub>20</sub> O <sub>8</sub>                  | [M-H]- | CHO   | 1.429 | 0.571 | 315.10843         | 1.23 | [M-H]- | 3 |                                                  |                               |                           |
|         |              |                                                                 | [M-H]- | CHO   | 1.429 | 0.571 | 315.10825         | 2.54 | [M-H]- | 3 |                                                  |                               |                           |
|         |              |                                                                 | [M-H]- | CHO   | 1.429 | 0.571 | 315.10819         | 2.76 | [M-H]- | 3 |                                                  |                               |                           |
|         | 329.0877987  | C <sub>14</sub> H <sub>18</sub> O <sub>9</sub>                  | [M-H]- | CHO   | 1.286 | 0.643 | 329.08718         | 1.05 | [M-H]- | 4 | 1-O-vanilloyl-β-D-glucose                        | CPD-15006                     | GrapeCyclPlantCyclMetaCyc |
|         |              |                                                                 | [M-H]- | CHO   | 1.286 | 0.643 | 329.08739         | 1.74 | [M-H]- | 4 | 1-O-vanilloyl-β-D-glucose                        | CPD-15006                     | GrapeCyclPlantCyclMetaCyc |
|         |              |                                                                 | [M-H]- | CHO   | 1.286 | 0.643 | 329.08731         | 2.00 | [M-H]- | 4 | 1-O-vanilloyl-β-D-glucose                        | CPD-15006                     | GrapeCyclPlantCyclMetaCyc |
|         |              |                                                                 | [M-H]- | CHO   | 1.286 | 0.643 | 329.08729         | 2.71 | [M-H]- | 4 | 1-O-vanilloyl-β-D-glucose                        | CPD-15006                     | GrapeCyclPlantCyclMetaCyc |
|         | 345.0827273  | C <sub>14</sub> H <sub>18</sub> O <sub>10</sub>                 | [M-H]- | CHO   | 1.286 | 0.714 | 345.08262         | 0.92 | [M-H]- | 2 |                                                  |                               |                           |
|         |              |                                                                 | [M-H]- | CHO   | 1.286 | 0.714 | 345.08275         | 1.13 | [M-H]- | 2 |                                                  |                               |                           |
|         | 355.1034696  | C <sub>16</sub> H <sub>20</sub> O <sub>9</sub>                  | [M-H]- | CHO   | 1.250 | 0.562 | 355.10305         | 2.63 | [M-H]- | 2 | 1-O-feruloyl-β-D-glucose                         | CPD-15281                     | PlantCyclMetaCyc          |
|         |              |                                                                 | [M-H]- | CHO   | 1.250 | 0.562 | 355.10288         | 2.92 | [M-H]- | 2 | 1-O-feruloyl-β-D-glucose                         | CPD-15281                     | PlantCyclMetaCyc          |
|         | 359.0984756  | C <sub>15</sub> H <sub>20</sub> O <sub>10</sub>                 | [M-H]- | CHO   | 1.333 | 0.667 | 359.09819         | 1.40 | [M-H]- | 5 |                                                  |                               |                           |
|         |              |                                                                 | [M-H]- | CHO   | 1.333 | 0.667 | 359.09805         | 1.65 | [M-H]- | 5 |                                                  |                               |                           |
|         |              |                                                                 | [M-H]- | CHO   | 1.333 | 0.667 | 359.09791         | 2.36 | [M-H]- | 5 |                                                  |                               |                           |
|         |              |                                                                 | [M-H]- | CHO   | 1.333 | 0.667 | 359.09798         | 2.55 | [M-H]- | 5 |                                                  |                               |                           |
|         |              |                                                                 | [M-H]- | CHO   | 1.333 | 0.667 | 359.09793         | 2.77 | [M-H]- | 5 |                                                  |                               |                           |
|         | 447.0933779  | C <sub>21</sub> H <sub>20</sub> O <sub>11</sub>                 | [M-H]- | CHO   | 0.952 | 0.524 | 447.09274         | 3.23 | [M-H]- | 2 | aureusidin 6-O-glucoside                         | CPD-8634                      | GrapeCyclPlantCyclMetaCyc |
|         |              |                                                                 | [M-H]- | CHO   | 0.952 | 0.524 | 447.09274         | 3.23 | [M-H]- | 2 | cyanidin 5-O-β-D-glucoside                       | CPD-7386                      | PlantCyc                  |
|         |              |                                                                 | [M-H]- | CHO   | 0.952 | 0.524 | 447.09274         | 3.23 | [M-H]- | 2 | cyanidin-3-O-β-D-galactoside                     | CPD-14998                     | PlantCyclMetaCyc          |
|         |              |                                                                 | [M-H]- | CHO   | 0.952 | 0.524 | 447.09274         | 3.23 | [M-H]- | 2 | cyanidin-3-O-β-D-glucoside                       | CPD1F-766                     | GrapeCyclPlantCyc         |
|         |              |                                                                 | [M-H]- | CHO   | 0.952 | 0.524 | 447.09274         | 3.23 | [M-H]- | 2 | isorientin                                       | ISOORIENTIN                   | PlantCyclMetaCyc          |
|         |              |                                                                 | [M-H]- | CHO   | 0.952 | 0.524 | 447.09274         | 3.23 | [M-H]- | 2 | kaempferol 3-O-β-D-galactoside                   | CPD-7260                      | PlantCyclMetaCyc          |
|         |              |                                                                 | [M-H]- | CHO   | 0.952 | 0.524 | 447.09274         | 3.23 | [M-H]- | 2 | kaempferol 3-O-β-D-glucoside                     | CPD1F-453                     | GrapeCyclPlantCyclMetaCyc |
|         |              |                                                                 | [M-H]- | CHO   | 0.952 | 0.524 | 447.09274         | 3.23 | [M-H]- | 2 | kaempferol 7-O-glucoside                         | CPD-8007                      | PlantCyc                  |
|         |              |                                                                 | [M-H]- | CHO   | 0.952 | 0.524 | 447.09274         | 3.23 | [M-H]- | 2 | luteolin 4'-O-β-D-glucoside                      | CPD-25365                     | MetaCyc                   |
|         |              |                                                                 | [M-H]- | CHO   | 0.952 | 0.524 | 447.09274         | 3.23 | [M-H]- | 2 | luteolin 7-O-β-D-glucoside                       | LUTEOLIN-7-O-BETA-D-GLUCOSIDE | PlantCyclMetaCyc          |
|         |              |                                                                 | [M-H]- | CHO   | 0.952 | 0.524 | 447.09274         | 3.23 | [M-H]- | 2 | orientin                                         | CPD-15083                     | PlantCyclMetaCyc          |
|         |              |                                                                 | [M-H]- | CHO   | 0.952 | 0.524 | 447.09274         | 3.23 | [M-H]- | 2 | quercetin 3-O-rhamnoside                         | CPD-8013                      | PlantCyclMetaCyc          |
|         |              |                                                                 | [M-H]- | CHO   | 0.952 | 0.524 | 447.09274         | 3.23 | [M-H]- | 2 | quercitrin                                       | QUERCITRIN                    | MetaCyc                   |

| Method | DI-FT-ICR-MS |                                                 |        |       |       |       | RP-UHPLC-Q-ToF-MS |      |        |   | Data base Annotation           |                               |                           |
|--------|--------------|-------------------------------------------------|--------|-------|-------|-------|-------------------|------|--------|---|--------------------------------|-------------------------------|---------------------------|
|        | m/z          | Formula                                         | Adduct | Class | H/C   | O/C   | m/z               | rt   | Ions   | n | Name                           | Data base ID                  | Data base                 |
|        |              |                                                 | [M-H]- | CHO   | 0.952 | 0.524 | 447.09286         | 3.31 | [M-H]- | 2 | aureusidin 6-O-glucoside       | CPD-8634                      | GrapeCyclPlantCyclMetaCyc |
|        |              |                                                 | [M-H]- | CHO   | 0.952 | 0.524 | 447.09286         | 3.31 | [M-H]- | 2 | cyanidin 5-O-β-D-glucoside     | CPD-7386                      | PlantCyc                  |
|        |              |                                                 | [M-H]- | CHO   | 0.952 | 0.524 | 447.09286         | 3.31 | [M-H]- | 2 | cyanidin-3-O-β-D-galactoside   | CPD-14998                     | PlantCyclMetaCyc          |
|        |              |                                                 | [M-H]- | CHO   | 0.952 | 0.524 | 447.09286         | 3.31 | [M-H]- | 2 | cyanidin-3-O-β-D-glucoside     | CPD1F-766                     | GrapeCyclPlantCyc         |
|        |              |                                                 | [M-H]- | CHO   | 0.952 | 0.524 | 447.09286         | 3.31 | [M-H]- | 2 | isoorientin                    | ISOORIENTIN                   | PlantCyclMetaCyc          |
|        |              |                                                 | [M-H]- | CHO   | 0.952 | 0.524 | 447.09286         | 3.31 | [M-H]- | 2 | kaempferol 3-O-β-D-galactoside | CPD-7260                      | PlantCyclMetaCyc          |
|        |              |                                                 | [M-H]- | CHO   | 0.952 | 0.524 | 447.09286         | 3.31 | [M-H]- | 2 | kaempferol 3-O-β-D-glucoside   | CPD1F-453                     | GrapeCyclPlantCyclMetaCyc |
|        |              |                                                 | [M-H]- | CHO   | 0.952 | 0.524 | 447.09286         | 3.31 | [M-H]- | 2 | kaempferol 7-O-glucoside       | CPD-8007                      | PlantCyc                  |
|        |              |                                                 | [M-H]- | CHO   | 0.952 | 0.524 | 447.09286         | 3.31 | [M-H]- | 2 | luteolin 4'-O-β-D-glucoside    | CPD-25365                     | MetaCyc                   |
|        |              |                                                 | [M-H]- | CHO   | 0.952 | 0.524 | 447.09286         | 3.31 | [M-H]- | 2 | luteolin 7-O-β-D-glucoside     | LUTEOLIN-7-O-BETA-D-GLUCOSIDE | PlantCyclMetaCyc          |
|        |              |                                                 | [M-H]- | CHO   | 0.952 | 0.524 | 447.09286         | 3.31 | [M-H]- | 2 | orientin                       | CPD-15083                     | PlantCyclMetaCyc          |
|        |              |                                                 | [M-H]- | CHO   | 0.952 | 0.524 | 447.09286         | 3.31 | [M-H]- | 2 | quercetin 3-O-rhamnoside       | CPD-8013                      | PlantCyclMetaCyc          |
|        |              |                                                 | [M-H]- | CHO   | 0.952 | 0.524 | 447.09286         | 3.31 | [M-H]- | 2 | quercitrin                     | QUERCITRIN                    | MetaCyc                   |
|        | 473.1876649  | C <sub>18</sub> H <sub>34</sub> O <sub>14</sub> | [M-H]- | CHO   | 1.889 | 0.778 | 473.18677         | 2.40 | [M-H]- | 2 |                                |                               |                           |
|        |              |                                                 | [M-H]- | CHO   | 1.889 | 0.778 | 473.18675         | 2.65 | [M-H]- | 2 |                                |                               |                           |
|        | 509.1513470  | C <sub>20</sub> H <sub>30</sub> O <sub>15</sub> | [M-H]- | CHO   | 1.500 | 0.750 | 509.15057         | 1.06 | [M-H]- | 2 |                                |                               |                           |
|        |              |                                                 | [M-H]- | CHO   | 1.500 | 0.750 | 509.15063         | 1.78 | [M-H]- | 2 |                                |                               |                           |
|        | 539.1619911  | C <sub>21</sub> H <sub>32</sub> O <sub>16</sub> | [M-H]- | CHO   | 1.524 | 0.762 | 539.16118         | 1.20 | [M-H]- | 5 |                                |                               |                           |
|        |              |                                                 | [M-H]- | CHO   | 1.524 | 0.762 | 539.16141         | 1.40 | [M-H]- | 5 |                                |                               |                           |
|        |              |                                                 | [M-H]- | CHO   | 1.524 | 0.762 | 539.16141         | 1.90 | [M-H]- | 5 |                                |                               |                           |
|        |              |                                                 | [M-H]- | CHO   | 1.524 | 0.762 | 539.16132         | 2.13 | [M-H]- | 5 |                                |                               |                           |
|        |              |                                                 | [M-H]- | CHO   | 1.524 | 0.762 | 539.16111         | 2.55 | [M-H]- | 5 |                                |                               |                           |
