# Supplementary material for: High-Resolution Mass Spectrometry-Based Metabolomics for Increased Grape Juice Metabolite Coverage
Source: MDPI journal article supplement (doi:10.3390/foods13010054), 2023-12-22
Supplement: s1 [file s1]

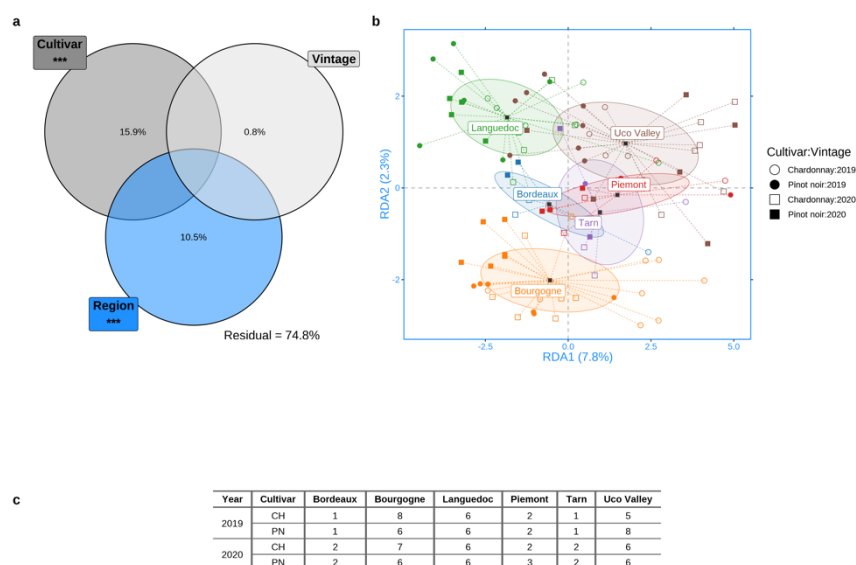

**Figure S3:** Multivariate statistical analysis of Chardonnay and Pinot noir grape juice metabolomes, detected by DI-FT-ICR-MS after SPE pretreatment; (a) Venn diagram representation of the variance partition of the entire dataset; (b) Redundancy Analysis (RDA) of the metabolome subset, which contributes to the variance explained by the geographical origin of juices, with the first two components (10.1%) contributing to nearly all the variance presented in (a), *i.e.* 10.5%; (c) summary of samples used for the variance partition and RDA studies.
