# Supplementary material for: High-Resolution Mass Spectrometry-Based Metabolomics for Increased Grape Juice Metabolite Coverage
Source: MDPI journal article supplement (doi:10.3390/foods13010054), 2023-12-22
Supplement: s1 [file s1]

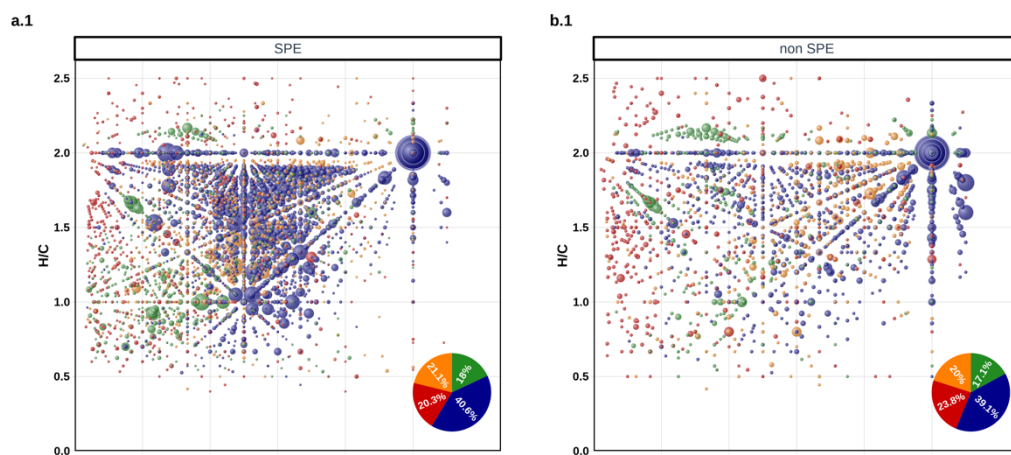

Figure S1: H/C vs O/C van Krevelen diagrams representation of all detected DI-FT-ICR-MS mass peaks transformed into assigned elemental compositions for SPE pretreated samples (left) and non SPE pretreated samples (right) with the following color code for elemental compositions: CHO (blue), CHON (orange), CHOS (green), CHONS (red)
