# Supplementary material for: High-Resolution Mass Spectrometry-Based Metabolomics for Increased Grape Juice Metabolite Coverage
Source: Foods. 2023 Dec 22;13(1):54. doi: 10.3390/foods13010054 (PMC10778666; doi:10.3390/foods13010054)
Supplement: Supplementary file 1 [file foods-13-00054-s001.zip]

Archive with 6 entries (6 files):
- FigureSup_S1.pdf
- FigureSup_S2.pdf
- FigureSup_S3.pdf
- FigureSup_S4.pdf
- FigureSup_S5.pdf
- SupTable.pdf
